# Supplementary material for: Stimulation of calcium-sensing receptors induces endothelium-dependent vasorelaxations via nitric oxide production and activation of IKCa channels
Source: PubMed Central journal article supplement (PMC4830458; doi:10.1016/j.vph.2016.01.001), 2016-05

# Supplementary Figure 1

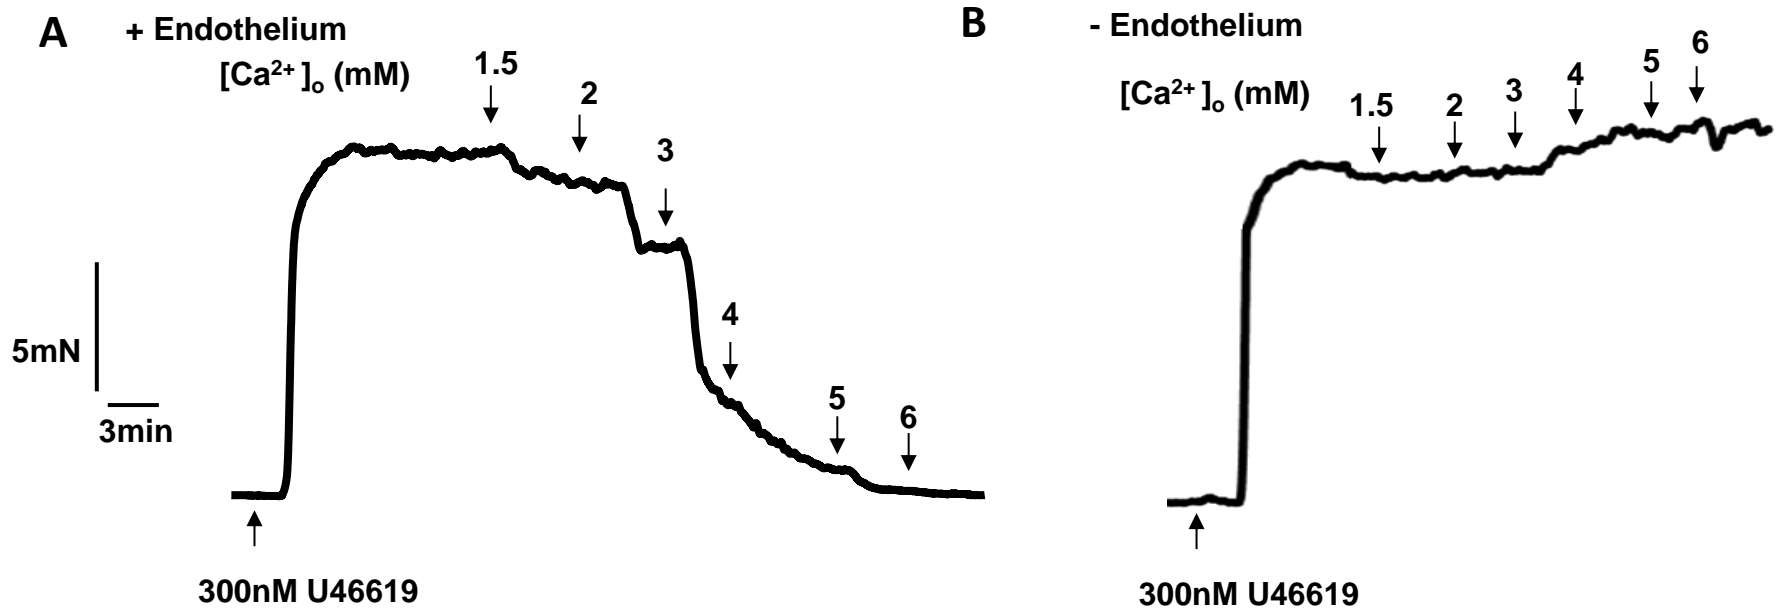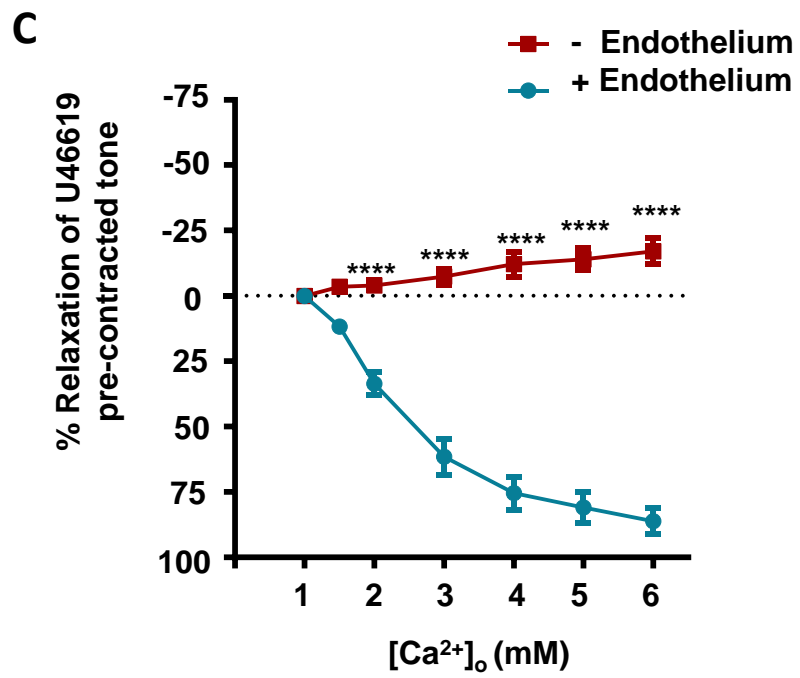

# Supplementary Figure 2

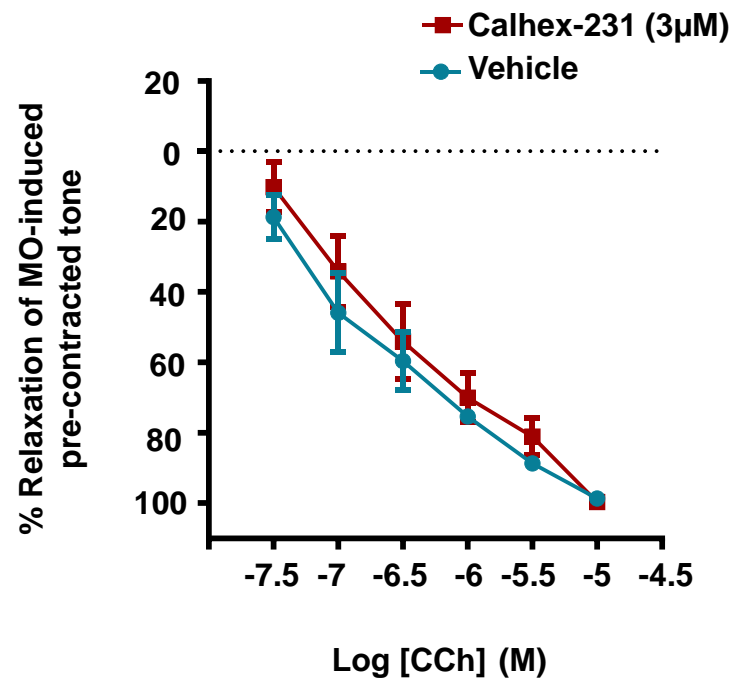

# Supplementary Figure 3

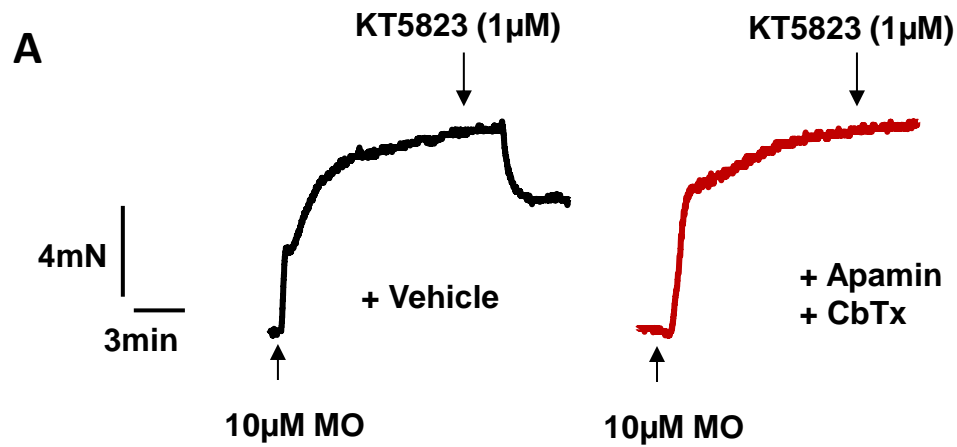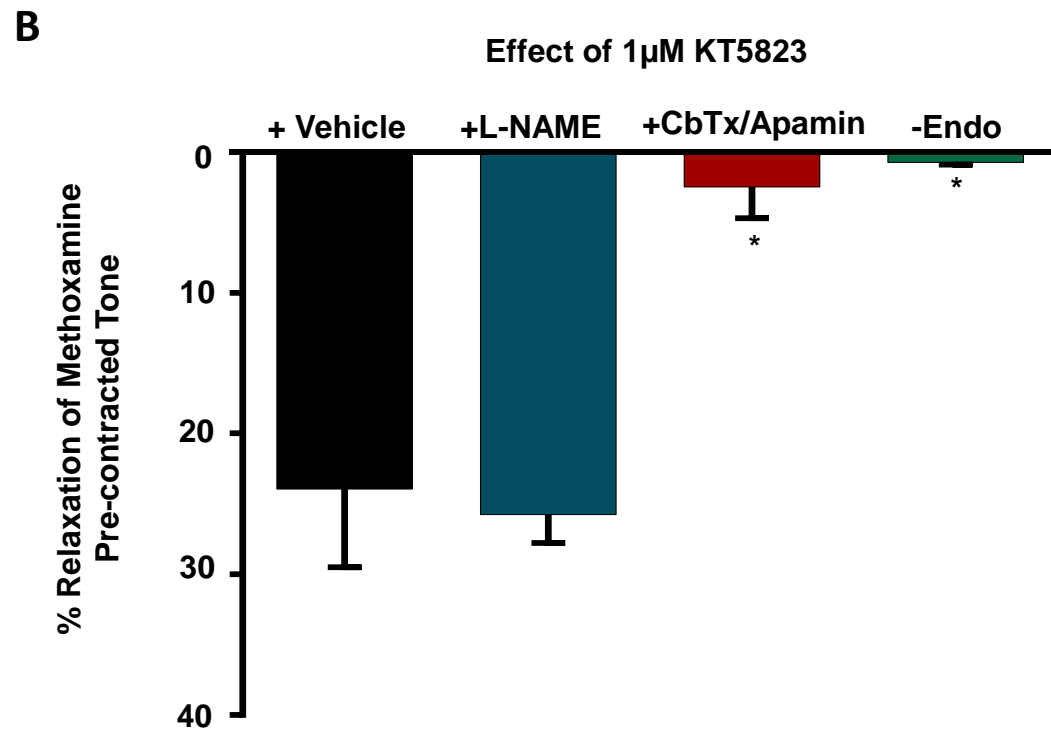

# Supplementary Figure 4

**A**

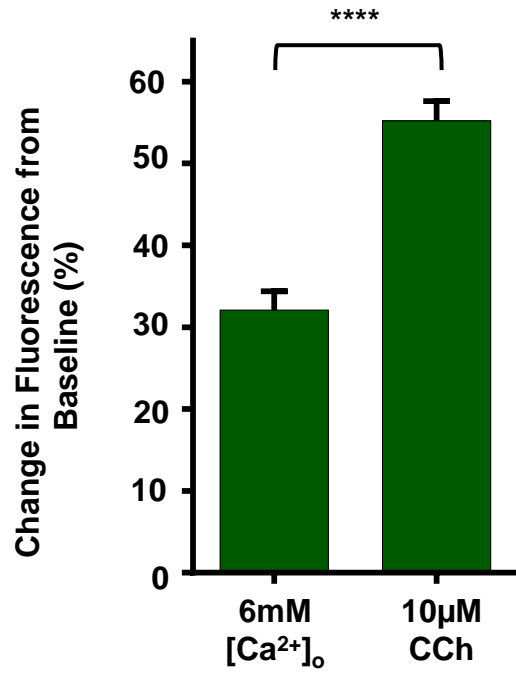

**B**

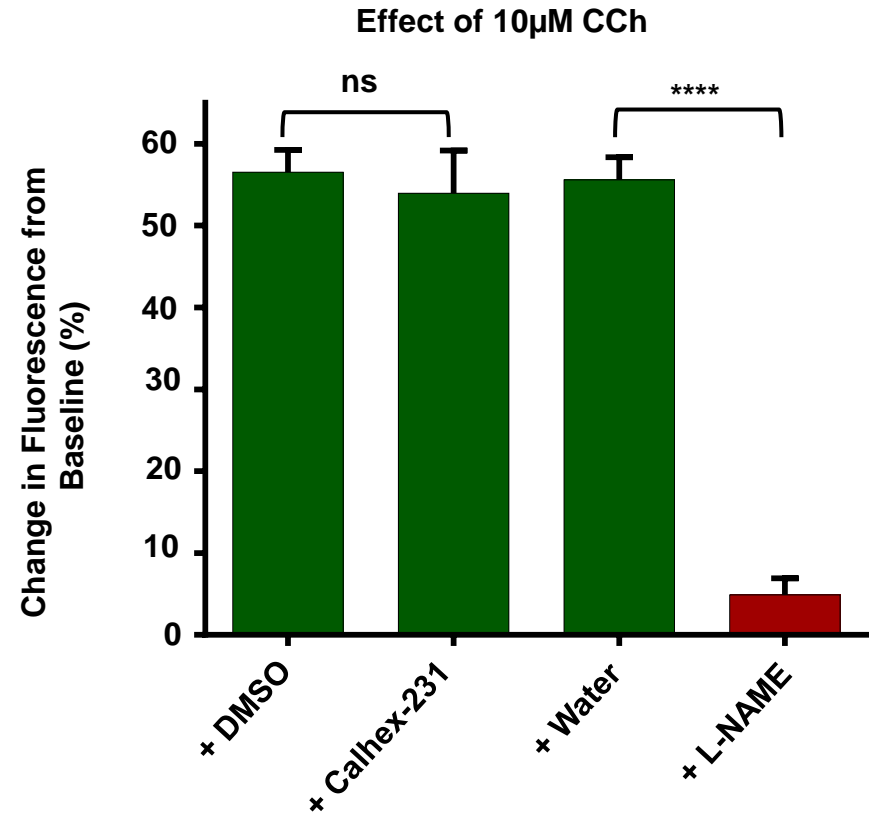

# Supplementary Figure 5

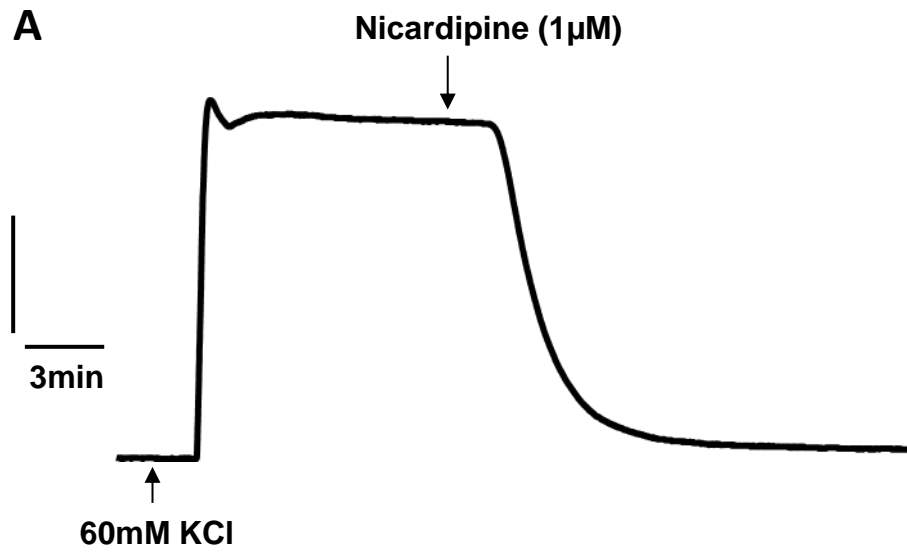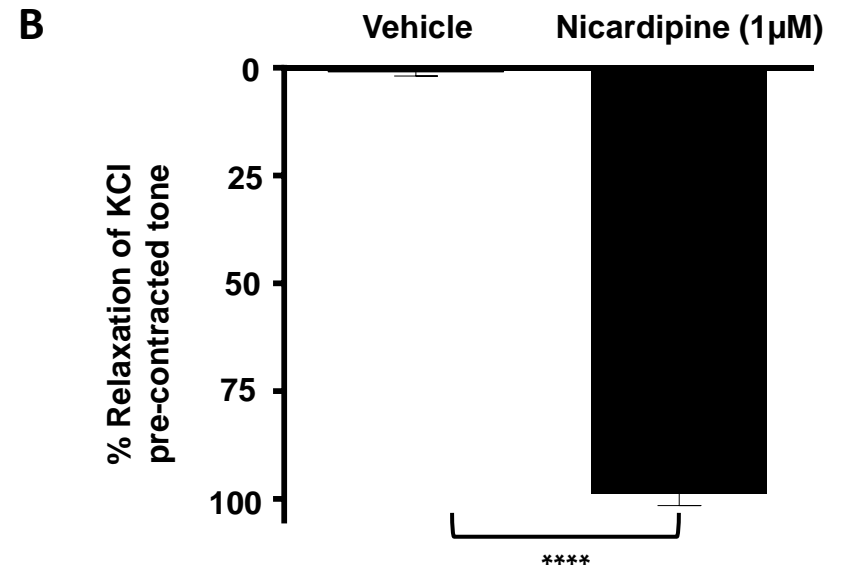

Supplement: mmc1.pdf [file mmc1.pdf]
